# Supplementary material
Source: Research Square preprint supplement (doi:10.21203/rs.3.rs-9412123/v1)
Supplement: Supplementary file 2 [file a02c6e8a98493ad32e933def.docx]

**How intersectoral governance shapes Community Health Workers’ roles in delivering integrated people-centred care: A realist evaluation in KwaZulu-Natal, South Africa**

**Authors:** Usangiphile E Buthelezi i,ii, Inge Petersen i,iii, Arvin Bhana i,iv, Zamasomi Luvuno i, Mosa Moshabela v, Sanah Bucibo i, Noxolisa Radebe i, Tasneem Kathree i, and André J van Rensburg I,ii.

**Affiliations:**

1. Centre for Research in Health Systems, University of KwaZulu Natal, Durban, South Africa
2. School of Medicine, University of KwaZulu-Natal, Durban, South Africa
3. Institute of Global Health, University College London, London, United Kingdom
4. South African Medical Research Council, Durban, South Africa
5. Vice-Chancellor, University of Cape Town, Cape Town, South Africa

*Corresponding author: Usangiphile E Buthelezi; Address: Mazisi Kunene Road Durban, 4001, South Africa; Email: [sahbut1@gmail.com](mailto:sahbut1@gmail.com); Phone: +2768 551 3508

**Highlights**

- Intersectoral collaboration platforms do not consistently produce coordinated, integrated care in practice.
- Weak accountability and unclear roles undermine sustained participation across sectors.
- Community Health Workers compensate for system gaps, extending beyond their formal mandates.
- Informal networks enable case resolution but reduce the reliability of coordination systems.
- Effective integration depends on aligning accountability, roles, and coordination processes.

**Abstract**

**Background:** Community Health Workers (CHWs) are central to advancing integrated, people-centred health systems, particularly in low- and middle-income countries where health and social needs intersect. Intersectoral governance platforms are promoted to support coordination across sectors, yet limited evidence exists on how these arrangements function in practice and how they shape CHWs’ ability to respond to complex household needs. This study examines these dynamics through a realist evaluation of Operation Sukuma Sakhe (OSS), a provincial intersectoral governance initiative in KwaZulu-Natal, South Africa.

**Methods:** A realist evaluation was conducted to explain how intersectoral collaboration influences CHWs’ contributions to integrated, people-centred care. Initial programme theories were developed from programme documents, OSS guidelines, prior realist research, and iterative team reflections. Five OSS governance platforms (“War Rooms”) were studied as cases. Data were collected through 15 observation visits and semi-structured interviews with War Room leaders. Data were analysed using retroductive reasoning to develop context–mechanism–outcome configurations and refine programme theories.

**Results:** Four key patterns emerged. Weak accountability led to unresolved cases and declining trust. Unclear roles and inconsistent participation generated role ambiguity, with CHWs assuming coordination responsibilities beyond their mandate. Limited institutional support sustained CHW engagement through moral obligation, but this weakened over time. Informal networks enabled case resolution but reinforced reliance on individual initiative rather than reliable systems.

**Conclusion:** Intersectoral collaboration does not produce integrated care through governance structures alone, but through how coordination is enacted in practice. Where accountability, role clarity, and system responsiveness are weak, collaboration fragments and the burden of integration shifts to CHWs. Strengthening intersectoral collaboration is therefore critical to ensuring that community-based care is supported by reliable, coordinated systems rather than individual efforts of frontline actors.

**Keywords**: Community Health Workers, Integrated People-Centred Health Services, Realist Evaluation, Intersectoral Collaboration, Collaborative Governance, Operation Sukuma Sakhe

**1. Introduction**

Community Health Workers (CHWs) are increasingly recognised as central actors in advancing integrated, people-centred health systems, particularly in low- and middle-income countries (LMICs) where health and social needs intersect (World Health Organization., 2018; Buthelezi, van Rensburg, *et al.*, 2025). Their embeddedness within communities positions them to support prevention, facilitate access to care, and strengthen continuity across levels of the health system (Kok *et al.*, 2015). Global policy frameworks, including the World Health Organisation Integrated People-Centred Health Services (IPCHS) framework, emphasise the role of community-based actors in linking individuals and households to coordinated, responsive systems of care (World Health Organisation, 2016).

As health systems shift toward integrated models of care, CHWs are increasingly expected to move beyond service delivery roles to support coordination across sectors, linking households not only to health services but also to social and community-based support systems (World Health Organisation, 2018). This reflects a broader recognition that complex and overlapping needs, such as those related to poverty, chronic illness, and social vulnerability, require responses that extend beyond the health sector. Intersectoral collaboration has therefore become a central strategy for strengthening health systems and improving equity in health outcomes (Rasanathan *et al.*, 2017; Aivalli, Gilmore, *et al.*, 2025).

However, integrated people-centred care cannot be delivered by CHWs alone. It depends on governance arrangements that enable coordination across sectors by aligning roles, accountability mechanisms, resources, and decision-making processes (Rasanathan *et al.*, 2017; World Health Organisation, 2018). Collaborative governance platforms are frequently introduced to facilitate such coordination, yet their functioning in practice remains uneven. A growing body of realist-informed research demonstrates that intersectoral collaboration is shaped not only by formal structures, but by underlying structural and relational mechanisms, including power dynamics, leadership, trust, and role clarity that influence participation, coordination, and collective action across sectors (Aivalli, Dada, *et al.*, 2025; Aivalli, Gilmore, *et al.*, 2025).

For example, recent realist work has shown that unequal resource distribution can reinforce dependency and undermine collaboration, while hierarchical relationships and lack of trust can limit participation and communication across sectors. Similarly, unclear roles and responsibilities can generate ambiguity and conflict, weakening accountability and coordination within collaborative platforms. At the same time, supportive leadership, equitable participation, and interpersonal relationships can help mitigate power imbalances and foster more effective collaboration (Aivalli, Dada, *et al.*, 2025; Aivalli, Gilmore, *et al.*, 2025). These studies advance understanding of how intersectoral collaboration operates as a complex, context-dependent process shaped by interacting structural and relational conditions.

Despite these advances, there remains limited empirical understanding of how such intersectoral governance arrangements shape the roles and practices of frontline actors, particularly CHWs, within real-world implementation contexts. Existing research has largely focused on system-level dynamics or on the outcomes of collaborative initiatives, with less attention to how these governance processes are experienced, negotiated, and operationalised at the community level (Sheikh, George and Gilson, 2014; Glandon *et al.*, 2018). This gap is critical, given that CHWs are increasingly positioned as key actors within intersectoral systems, yet often operate within constraints related to authority, resources, and institutional support (Buthelezi, Rensburg, *et al.*, 2025).

Operation Sukuma Sakhe (OSS) in KwaZulu-Natal, South Africa, provides an analytically valuable case through which to examine these dynamics. OSS is a provincial intersectoral initiative designed to coordinate government departments and community actors through ward-level governance platforms (“War Rooms”), aligned to primary health care outreach teams (Province of KwaZulu-Natal, 2015). These platforms aim to facilitate coordinated responses to household needs across sectors, positioning CHWs within local systems of collaborative governance (Province of KwaZulu-Natal, 2011). As such, OSS represents an institutional attempt to operationalise intersectoral, community-level governance in support of integrated people-centred care in a resource-constrained setting.

To examine these dynamics, this study draws on realist evaluation, an approach that seeks to explain how outcomes are generated through interactions between context and underlying mechanisms (Pawson and Tilley, 1997). Realist evaluation is particularly suited to this inquiry because the effectiveness of intersectoral collaboration depends not only on the presence of governance structures, but on how these structures interact with context to trigger mechanisms that shape behaviour, decision-making, and coordination across actors. By applying a realist lens, this study moves beyond descriptive accounts of intersectoral collaboration to develop an explanatory understanding of how governance arrangements shape CHWs’ roles in practice. This study, therefore, asks, How, why, for whom, and under what circumstances does intersectoral collaboration within OSS enable or constrain CHWs’ roles in delivering integrated people-centred care?

**2. Methodology**

**2.1 Study Design**

This study employed a realist evaluation to examine how intersectoral collaboration within OSS shapes CHWs' roles in delivering integrated people-centred care. Realist evaluation is a theory-driven approach that seeks to explain how and why outcomes are generated through interactions between context and underlying mechanisms, rather than assessing whether an intervention works in isolation (Pawson and Tilley, 1997). This approach was appropriate for this study because intersectoral collaboration, as operationalised through OSS, represents a complex governance intervention whose effects are contingent on context, actor relationships, and institutional arrangements. The functioning of OSS War Rooms depends not only on their formal design, but on how these structures interact with local conditions to influence stakeholder participation, decision-making, and coordination across sectors. As such, outcomes are shaped by underlying mechanisms that are triggered differently across contexts.

The study followed a realist logic of inquiry comprising three iterative phases: (1) development of an initial programme theory (IPT), (2) empirical testing of the IPT through data collection in OSS War Rooms, and (3) refinement of programme theories to explain how intersectoral collaboration enables or constrains CHWs’ contributions to integrated people-centred care (Figure 1). This approach enabled the study to move beyond descriptive accounts of collaboration to generate an explanatory understanding of how governance arrangements shape frontline practice. To guide this process rigorously and transparently, the study drew on the Realist and Meta-narrative Evidence Syntheses: Evolving Standards (RAMESES II) guidelines to inform the design and reporting of the findings (Wong *et al.*, 2016).


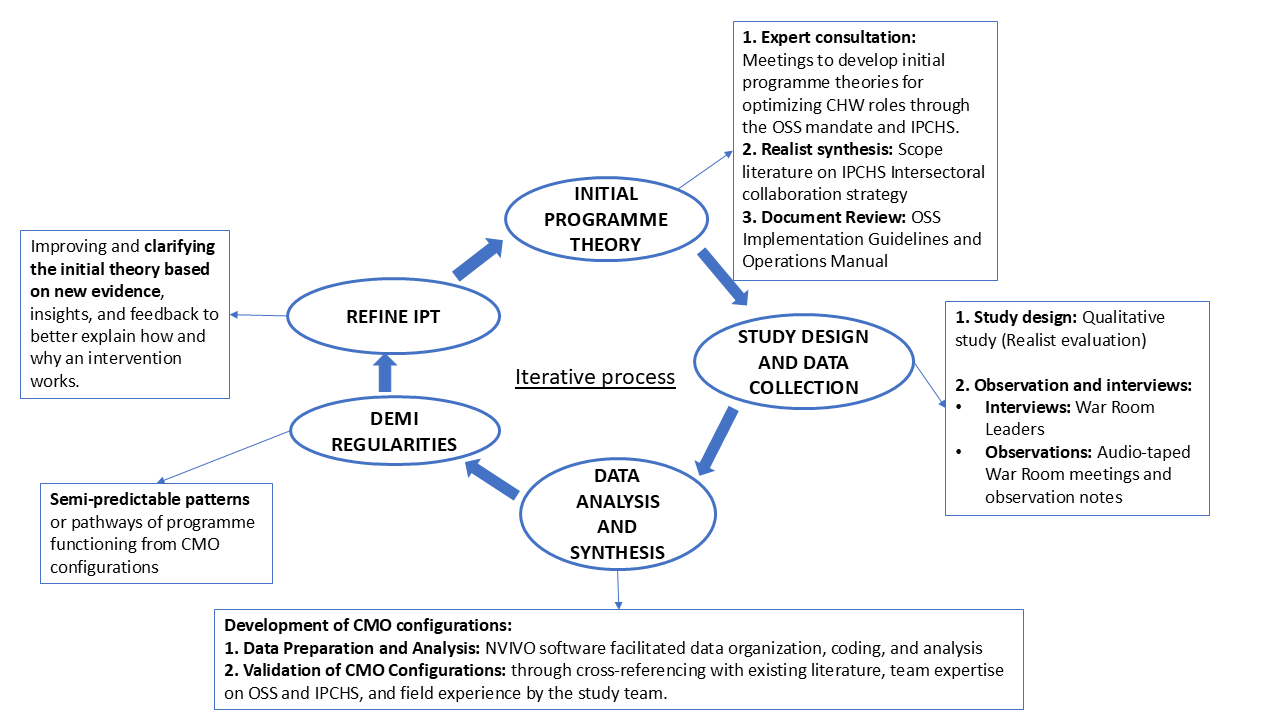


**Figure 1:** Adapted Realist Cycle of Inquiry Utilised in the Study (Pawson and Tilley, 1997; Buthelezi, van Rensburg, *et al.*, 2025)

**2.2 Study Setting and Intervention**

The study was conducted in the uMgungundlovu District of KwaZulu-Natal, South Africa, a setting characterised by a high burden of HIV and tuberculosis, alongside significant socio-economic challenges including poverty, unemployment, and limited access to basic services (Human Sciences Research Council, 2024; National Department of Health, South Africa, no date). These overlapping health and social needs necessitate coordinated responses across sectors, making the district an appropriate setting for examining intersectoral collaboration in practice.

Operation Sukuma Sakhe (OSS) is a provincial intersectoral governance initiative established to coordinate service delivery across government departments, civil society, and community stakeholders (Province of KwaZulu-Natal, 2011, 2015). OSS is implemented through ward-level governance platforms known as “War Rooms,” which serve as structured spaces for identifying household needs, facilitating referrals, and coordinating responses across sectors (Province of KwaZulu-Natal, 2011, 2015). These platforms aim to bring together actors from health, social services, education, and other sectors to address complex and interrelated community challenges.

The OSS War Rooms are aligned with Ward-Based Primary Health Care Outreach Teams (WBPHCOTs), a national strategy for strengthening primary health care delivery in South Africa (Khuzwayo and Moshabela, 2017; National Department of Health, South Africa, 2018; Schneider *et al.*, 2018). Within this system, CHWs play a central role in linking households to services through activities such as household profiling, health promotion, risk screening, and referrals. In addition to facilitating access to health services, CHWs also identify social needs and refer households to the War Room for coordinated, multisectoral response.

As such, OSS represents an institutional attempt to operationalise intersectoral collaboration at the community level by integrating governance structures with frontline service delivery. The War Room platform provides a context in which CHWs are positioned within broader systems of coordination, making it an analytically relevant case for examining how governance arrangements shape their roles and functions in delivering integrated people-centred care.

**2.3 Initial Programme Theory (IPT) Development**

**Table 1: Data Sources Informing Initial Programme Theory (IPT)**

| Source | Contribution to IPT Development |
| --- | --- |
| Realist synthesis and household-level empirical data (Buthelezi, Rensburg, *et al.*, 2025; Buthelezi, van Rensburg, *et al.*, 2025) | Provided theoretical and empirical insights into how intersectoral collaboration operates in community health systems, particularly in resource-constrained settings. Informed assumptions about mechanisms such as trust, motivation, and CHWs’ relational roles in linking households to services. |
| OSS implementation guidelines (Province of KwaZulu Natal Department of Human Settlements, 2013) | Clarified the intended design, structure, and functioning of the OSS platform, including expectations for intersectoral coordination and governance at the War Room level. |
| OSS operations handbook/manual (Province of KwaZulu-Natal, 2011, 2015) | Detailed the formal roles and responsibilities of stakeholders (e.g., CHWs, government departments, NGOs), informing assumptions about role boundaries, accountability, and coordination processes. |
| Research team expertise and iterative discussions | Enabled contextualisation and refinement of theoretical assumptions through multidisciplinary insights in public health, intersectoral governance, and realist methodology. |

The initial programme theory (IPT) was developed to articulate how intersectoral collaboration within the OSS platform was expected to enable CHWs to deliver integrated people-centred care. In realist evaluation, the IPT represents a set of theoretically informed assumptions about how an intervention is intended to work, specifying relationships between context, mechanisms, and outcomes (Pawson and Tilley, 1997; Marchal *et al.*, 2012).

The IPT was developed through the synthesis of multiple data sources to ensure both theoretical grounding and contextual relevance. These sources included: (i) OSS policy and implementation documents (Province of KwaZulu-Natal, 2011, 2015), which provided insight into the intended design and functioning of the War Room platform; (ii) OSS operational guidelines (Province of KwaZulu Natal Department of Human Settlements, 2013), which outlined roles, responsibilities, and processes for intersectoral collaboration; (iii) prior realist-informed research on CHWs and intersectoral collaboration, including a realist synthesis and household-level empirical data (Buthelezi, Rensburg, *et al.*, 2025; Buthelezi, van Rensburg, *et al.*, 2025); and (iv) iterative discussions within the multidisciplinary research team, drawing on expertise in community health systems, intersectoral governance, and realist methodology.

These sources were analysed to identify assumptions about how OSS governance structures were expected to influence stakeholder behaviour and coordination processes. Particular attention was given to identifying hypothesised mechanisms, including perceived support, trust, motivation, and role clarity, through which CHWs and other actors would engage in intersectoral collaboration, and the contextual conditions under which these mechanisms were likely to be triggered.

The resulting IPT articulated how War Room platforms were expected to function as spaces for coordinated decision-making and service delivery, enabling CHWs to act as connectors between households, health services, and other sectors. The IPT served as a guiding framework for data collection and analysis, informing the selection of cases, the design of data collection tools, and the identification of context–mechanism–outcome (CMO) configurations during the empirical phase of the study. The IPTs are presented in Table 2.

**Table 2: Initial Programme Theory – CHWs within OSS and Intersectoral Collaboration**

| Context (C) | Mechanism (M) | Outcome (O) |
| --- | --- | --- |
| CHWs are included in War Room platforms intended for multi-stakeholder decision-making | CHWs interpret inclusion as recognition of their role and feel legitimised to participate in coordination processes | Increased engagement of CHWs in intersectoral coordination and service delivery |
| Multiple government sectors and stakeholders are expected to participate in War Rooms | Stakeholders perceive shared responsibility for addressing community needs, encouraging collaboration across sectors | More coordinated and holistic responses to household needs |
| War Rooms provide a structured platform for reporting and tracking service delivery issues | Stakeholders believe that issues raised will be addressed through formal processes, reinforcing participation and accountability | Improved follow-up and resolution of cases |
| CHWs operate in contexts with limited access to healthcare services | CHWs perceive their role as essential in bridging service gaps, reinforcing motivation to support households | Improved access to care and continuity of services |
| Intersectoral collaboration is expected to reduce fragmentation across government services | Service providers recognise the value of coordinated action and are willing to align efforts across sectors | Reduced duplication and improved efficiency in service delivery |

**2.4 Case Selection and Data Collection**

**2.4.1 Case Selection**

A multiple case study design was employed to enable an in-depth examination of how intersectoral collaboration within OSS operates across different local contexts. Five OSS War Rooms were purposively selected as cases, each representing a ward-level governance platform where CHWs, government departments, non-governmental organisations, and community stakeholders interact to address household-level needs.

Each War Room was visited on three occasions between February and July 2023. These repeated observations were treated as a single case per War Room, resulting in 15 observation visits across five cases. This longitudinal approach enabled the study to capture temporal variations in stakeholder participation, leadership dynamics, intersectoral engagement, and the functioning of coordination processes within the War Room platform. By examining multiple cases over time, the study was able to explore how contextual differences shaped the enactment of intersectoral collaboration and CHWs’ roles within these governance structures.

**2.4.2 Data Collection**

Data collection was guided by the initial programme theory (IPT) and aimed to examine how intersectoral collaboration was enacted in practice, and how governance arrangements influenced stakeholder behaviour, decision-making, and coordination across sectors.

**Non-participant observations**

Non-participant observations of War Room meetings were conducted using a structured observation schedule to document key features of intersectoral collaboration in practice. Observations focused on patterns of stakeholder attendance and participation, leadership and facilitation processes, intersectoral interactions and communication, decision-making processes, and follow-up on identified issues. Particular attention was given to the roles and contributions of CHWs within these meetings, including how they engaged with other stakeholders and navigated coordination processes.

These observations provided direct insight into how the War Room platform functioned as a governance mechanism and how formal structures were translated into practice within specific contexts.

**Semi-structured interviews**

Semi-structured interviews were conducted with War Room leaders, who are ward councillors or appointed chairpersons, during the final visit to each case. These interviews explored participants’ experiences and perceptions of intersectoral collaboration, including facilitators and constraints to coordination, stakeholder engagement, and decision-making processes.

In addition, the interviews examined participants’ perspectives on the roles and functions of CHWs within the OSS platform, providing insight into how these roles were understood, negotiated, and supported within intersectoral governance arrangements. This enabled the study to capture stakeholders’ reasoning and interpretations, which are central to identifying underlying mechanisms in realist evaluation.

**Document review**

Relevant OSS policy and implementation documents, including operational guidelines and manuals, were reviewed to understand the intended design and functioning of the War Room platform. These documents provided insight into formal expectations regarding stakeholder roles, coordination processes, and governance structures, and were used to contextualise observed practices and support interpretation of empirical findings.

**2.4.3 Research Team and Reflexivity**

Data collection was conducted by the lead researcher (UEB), supported by two experienced researchers (SB and NR) with extensive backgrounds in community health systems and intersectoral collaboration. The involvement of multiple researchers facilitated discussion, triangulation, and supported critical reflection on emerging interpretations throughout the data collection process.

Regular discussions within the data collection team and the broader research team enabled the refinement of observations and interpretations, ensuring that the analysis remained grounded in both empirical data and contextual understanding. This collaborative approach strengthened the credibility of the findings and supported the iterative refinement of programme theories.

**2.5 Data Analysis**

**2.5.1 Analytical Approach**

Data were analysed using a realist analytical approach, guided by retroductive reasoning to explain how intersectoral collaboration within OSS generated outcomes through interactions between context and underlying mechanisms (Mukumbang *et al.*, 2020; McEwan *et al.*, no date). Rather than seeking to identify patterns solely at a descriptive level, the analysis aimed to develop explanatory accounts of how and why observed practices emerged within specific governance contexts.

The analytical process was iterative and theory-driven, involving continuous movement between empirical data and the IPT. Data from observations, interviews, and document review were integrated and examined to assess the extent to which the IPT was supported, refined, or contradicted. This approach enabled the identification of causal processes underpinning intersectoral collaboration and the roles of CHWs within OSS.

**2.5.2 Identification of Context–Mechanism–Outcome Configurations**

The analysis focused on the development of context–mechanism–outcome (CMO) configurations to explain how intersectoral collaboration generated outcomes through interactions between contextual conditions and underlying causal processes (Pawson and Tilley, 1997). Contexts were conceptualised as the structural, organisational, and relational conditions within which OSS was implemented, while mechanisms were understood as the underlying reasoning and responses of actors triggered in particular contexts (Dalkin *et al.*, 2015; Lacouture *et al.*, 2015; Greenhalgh and Manzano, 2022). Outcomes reflected the observable patterns of action and interaction emerging from these dynamics.

Data from observations, interviews, and document review were iteratively examined to identify and link relevant contextual conditions, actor responses, and observed outcomes. This process involved moving beyond surface-level descriptions to infer underlying causal mechanisms through retroductive reasoning. Initial coding was guided by sensitising concepts derived from the IPT, while remaining open to the identification of new or modified explanations emerging from the data. Provisional CMO configurations were developed and refined through constant comparison within and across cases, enabling the identification of recurring explanatory patterns as well as variations linked to contextual differences. These configurations were not treated as fixed categories but were iteratively tested and refined as part of the broader process of programme theory development.

**2.5.3 Programme Theory Refinement**

The identified CMO configurations were used to refine the initial programme theory, resulting in the development of contextually grounded explanations of how OSS enabled or constrained CHWs’ roles in delivering integrated people-centred care. This process involved comparing empirical findings with the assumptions embedded in the IPT, identifying areas of convergence, divergence, and refinement. A particular focus was also given to understanding how mechanisms operated across different contexts, including how certain conditions enabled or inhibited their activation. This allowed for the development of more nuanced explanations that accounted for variability and similarities in outcomes across cases. The refined programme theory synthesises these insights into a coherent explanatory account of how intersectoral governance arrangements shape frontline practice, highlighting both enabling and constraining dynamics within the OSS platform.

**2.6 Systems Analysis**

To complement the realist analysis, systems thinking was applied through the use of causal loop diagrams (CLDs) to support the interpretation of the relationships and patterns identified in the data. CLDs were used as an analytical tool to visualise how different elements of intersectoral collaboration interacted over time, and how feedback processes influenced the functioning of the OSS platform.

Drawing on the CMO configurations developed during analysis, CLDs were constructed to represent relationships between key factors shaping CHWs’ roles within intersectoral governance arrangements. This approach enabled the identification of reinforcing and balancing feedback loops that helped explain how certain patterns of collaboration were sustained, amplified, or constrained within specific contexts.

The use of CLDs supported a systems-level interpretation of the findings by illustrating how multiple mechanisms interacted across levels of the intersectoral governance system, rather than operating in isolation. In doing so, this approach complemented the realist focus on causal explanation by highlighting the dynamic and interconnected nature of intersectoral collaboration in practice.

**2.7 Ethical Considerations**

Ethical approval for the study was obtained from the Biomedical Research Ethics Committee (BREC) of the University of KwaZulu-Natal (Ref: BREC/00002768/2021), with additional permissions secured from relevant provincial and district health authorities. All participants provided informed consent before participation, and permission was obtained for observations conducted during War Room meetings. All procedures were conducted with strict adherence to confidentiality and cultural sensitivity.

**3. Results**

**3.1 Overview**

Five OSS War Rooms were examined as case studies, comprising 15 observation visits conducted between February and July 2023, complemented by semi-structured interviews with War Room leaders and review of relevant policy and implementation documents. Analysis of these data generated five CMO configurations that explain how intersectoral collaboration within OSS operates in practice and how it shapes CHWs’ roles in delivering integrated people-centred care. These configurations capture patterns related to accountability and convening power, role ambiguity and CHW role strain, institutional support and sustained engagement, the use of informal networks, and constraints within case management and referral processes. The findings below present these empirically grounded configurations, illustrating how intersectoral governance arrangements enable and constrain coordinated service delivery at the community level.

**3.2 Accountability and Convening Power (CMO 1)**

War Rooms are institutionally positioned as intersectoral governance platforms intended to convene multiple government departments, community stakeholders, and service providers to coordinate responses to household-level needs. Their placement within the Office of the Premier is intended to provide authority to demand accountability, coordinate interdepartmental responses, and ensure follow-up on identified issues. However, in practice, this formal authority is unevenly enforced. In contexts where accountability mechanisms are weak, stakeholders perceive participation as optional rather than obligatory. This is reflected in persistent absenteeism among key departments, particularly those responsible for critical services such as water, transport, and housing. As one participant noted:

“Most of the time, representatives for different departments do not attend, which causes a challenge for us. We would discuss a matter this month that was discussed the previous month, and there would not be any changes taking place.” (GUA-WRL)

Similarly, frustration with the absence of key departments was evident:

“…Water, transport… there are no roads, there is no water, there are no houses. They are the ones who should be attending, but you find that they are the ones who are running away.” (WRL-GUA)

Even when issues are escalated through formal channels, responses are often delayed or absent:

“We report, but nothing ever happens… There is nothing that holds them accountable.” (GUA-WRL)

In contrast, some stakeholders interpret participation as a responsibility and emphasise the importance of attendance:

“…These people need to know that they need to honour these meetings because there is so much they can learn…” (TYS-WR-102)

This variation in how accountability is perceived and enacted leads to inconsistent stakeholder engagement. While some actors respond positively to accountability mechanisms, others remain disengaged. As a result, cases are repeatedly discussed without resolution, leading to stagnation, delays, and growing frustration among participants. Over time, this weakens confidence in the War Room as an effective platform for intersectoral coordination. This suggests that where accountability is not actively enforced, the perceived optionality of participation undermines collective action, resulting in unresolved cases and weakening the capacity of the War Room to function as an effective mechanism for intersectoral coordination.

**3.3 Role Ambiguity and CHW Role Strain (CMO 2)**

CHWs operate in contexts characterised by high levels of unmet social and municipal needs, where households require support beyond healthcare services. However, inconsistent participation from relevant departments creates gaps in service delivery, requiring CHWs to engage with issues that fall outside their formal scope of practice.

This creates role ambiguity, as CHWs are expected to navigate responsibilities that are not clearly defined within the OSS mandate. As one participant questioned:

“Who is responsible for electricity and water? Health does not pay them to talk about the road… Who is supposed to be here in the War Room to tell us about roads?” (TYS-WR-100)

Similarly, the expectation that CHWs should report on a wide range of issues leads to confusion about roles:

“I heard someone say that they end up reporting everything and wonder what others do exactly.” (WRL-GUA)

Despite these uncertainties, CHWs feel a strong moral obligation to respond to household needs. This often leads them to extend beyond their formal responsibilities, sometimes using personal resources to assist community members:

“Me buying for them is not allowed at work… So, I would find myself taking out a lot of money buying for these groups.” (WR-TYS)

This tension between institutional constraints and moral responsibility creates ethical dilemmas and emotional strain. CHWs become deeply involved in the lives of households, leading to internal conflict and questioning of their roles:

“So maybe me working for the community… is a mistake now because I have immersed myself too deeply… Should I back off and not work?” (TYS-WR-102)

Over time, this overextension contributes to frustration, burnout, and disengagement. Some CHWs begin to withdraw, while others consider leaving their roles altogether:

“I went to my supervisors on Monday and told them that I would like to step down from this role.” (TYS-WR-102)

These findings demonstrate how unclear multisectoral roles, combined with systemic gaps, lead to role strain and negatively affect both CHW well-being and service delivery. This suggests that in contexts where roles are unclear and institutional support is inconsistent, CHWs respond to unmet needs through moral obligation, leading to overextension, emotional strain, and, over time, attrition and disengagement that eventually undermine the sustainability of coordinated service delivery.

**3.4 Institutional Support, Legitimacy, and Sustained Motivation (CMO 3)**

War Rooms and CHWs operate within resource-constrained environments characterised by limited infrastructure, lack of equipment, and insufficient institutional support. These constraints affect the ability of stakeholders to effectively coordinate and deliver services.

As one War Room leader described:

“There is nothing. There is no printing machine… the office is still empty.” (WRL-GUA)

Despite these limitations, stakeholders continue to engage in service delivery, driven by a sense of responsibility and commitment to the community:

“We need resources to function, but we have to rely on what we have or improvise.” (TYS-WRL)

In many cases, actors rely on external support from NGOs or personal initiative to compensate for resource gaps:

“I once reported before about the fact that we do not have transport and are relying on the NGOs.” (TYS-WR-100)

However, repeated experiences of limited support and unresolved cases reduce stakeholders’ sense of efficacy and undermine their motivation. Over time, this leads to demotivation and disengagement:

“I went to my supervisors on Monday and told them that I would like to step down from this role.” (TYS-WR-102)

The lack of institutional support not only affects service delivery but also weakens the perceived legitimacy of the system, contributing to service delays and erosion of trust within communities. This suggests that in resource-constrained contexts, initial engagement is sustained by CHWs’ sense of responsibility to communities, but in the absence of institutional support and responsive systems, declining perceptions of efficacy and legitimacy lead to demotivation and disengagement, undermining sustained participation and coordinated service delivery.

**3.5 Informal Networks as Compensatory Governance (CMO 4)**

In contexts where formal coordination mechanisms are weak or ineffective, stakeholders increasingly rely on informal networks and personal relationships to resolve cases. These informal strategies are often used to bypass bureaucratic delays and facilitate quicker responses.

As one War Room leader explained:

“If we have identified a problem of not having transportation… ‘Mbatha, why don’t you provide transport?’… I remembered that Human Science has a speaker and cars; they can help out.” (WRL-TYS)

Similarly, partnerships with local organisations play an important role in addressing specific issues:

“We have an organization called Ncema… which is very useful when it comes to GBV… its founders are from the ward.” (TYS-WRL)

While these informal arrangements can lead to the successful resolution of some cases, they are not systematically embedded within institutional processes. Instead, outcomes depend on individual initiative and the availability of personal networks. This reliance on informal mechanisms introduces variability in service delivery and shifts responsibility from structured governance systems to individual actors, limiting the consistency and sustainability of intersectoral collaboration.

**3.6 Case Management and Referral Bottlenecks (CMO 5)**

The effectiveness of case management and referral processes within War Rooms is constrained by systemic barriers, including bureaucratic complexity, unclear responsibilities, and delays across multiple departments. These challenges affect the ability of stakeholders to resolve cases efficiently. In some instances, cases are escalated to higher authorities in an attempt to overcome these barriers:

“I elevate the council matters to the Speaker… and see how we come up with a solution between the Traditional Council and the Municipal Council.” (GUA-102)

However, when cases stall within the system, stakeholders often experience uncertainty about how to proceed:

“…they hadn’t found the relative yet… now they do not know how to continue regarding that case.” (CAD-WR-102)

Administrative processes further contribute to delays, particularly for complex cases involving multiple steps:

“It can happen that you have one today and the next one in July or even in September… It entirely depends on the case load at Home Affairs.” (TYS-WRL)

In some cases, these delays extend over several years, affecting access to essential services:

“The mother will wait for 2 to 3 years… firstly she will have to get a birth certificate before getting an ID…” (TYS-WRL)

These prolonged delays result in unresolved vulnerabilities, frustration among stakeholders, and declining trust in the system’s ability to deliver coordinated services effectively. These findings indicate that where referral processes are fragmented and responsibilities are unclear, stalled cases generate uncertainty and frustration among stakeholders, resulting in prolonged delays, unresolved vulnerabilities, and declining trust in the system’s capacity to coordinate responses effectively.

**3.7 System-Level Dynamics of Intersectoral Collaboration**

The causal loop diagram (Figure 2) provides a system-level perspective on how patterns of intersectoral collaboration within OSS unfold over time. It highlights how different elements of the governance environment, stakeholder engagement, and service delivery processes interact dynamically, shaping the overall functioning of the War Room platform. Rather than representing isolated processes, the diagram illustrates how these elements are interconnected through reinforcing and balancing dynamics that influence the ability of the system to coordinate responses to community needs.

A central feature of the system is the accumulation of unresolved cases, which emerges as a critical point of convergence across the findings. As demonstrated in the preceding sections, weak accountability, inconsistent stakeholder participation, and delays within referral systems contribute to cases remaining unresolved. At a system level, this does not remain a static outcome but becomes a driver of further system dysfunction. As cases accumulate without resolution, confidence in the War Room as a coordinating platform declines, reducing stakeholder motivation to attend and engage. This, in turn, further weakens accountability and reinforces patterns of poor participation, creating a self-reinforcing cycle of limited coordination and ineffective service delivery.

At the same time, the system contains potential stabilising dynamics linked to effective case resolution. Where stakeholders attend, engage, and follow through on agreed actions, cases are resolved, which strengthens confidence in the system and supports continued participation. However, as reflected in the empirical findings, these stabilising processes are fragile and contingent on sustained accountability, clear roles, and institutional support. In their absence, reinforcing negative cycles dominate, limiting the system’s capacity to function as intended.

The role of CHWs within this system is particularly significant. As highlighted in earlier sections, CHWs are positioned at the interface between households and the broader service delivery system, and often attempt to compensate for gaps in coordination. At a system level, this manifests as adaptive behaviour in response to systemic constraints. CHWs engage in follow-up, draw on past experiences, and mobilise informal networks to facilitate case resolution. While these actions can interrupt negative cycles and contribute to resolving individual cases, they also shift the burden of coordination from institutional processes to individual actors. As a result, system performance becomes dependent on the capacity, motivation, and networks of specific individuals, rather than on reliable and institutionalised mechanisms or systems.

Resource constraints and limitations in system navigation further interact with these dynamics. As previously described, inadequate material support, limited transport, and bureaucratic complexity contribute to delays in case management and referral processes. At a system level, these constraints reinforce the accumulation of unresolved cases and weaken the effectiveness of coordination mechanisms. In turn, this reduces stakeholders’ perceived efficacy and contributes to declining engagement over time.

Overall, the system is characterised by the interaction of reinforcing cycles that sustain poor coordination and balancing processes that have the potential to support effective intersectoral collaboration. The dominance of reinforcing negative dynamics, particularly those linked to weak accountability, role ambiguity, and institutional constraints, limits the ability of the War Room platform to function as an effective platform for integrated people-centred care. As illustrated in Figure 2, improving system performance therefore depends on disrupting these reinforcing cycles while strengthening conditions that support sustained participation, accountability, and coordinated action across sectors. In addition, this systems perspective demonstrates that coordination challenges are not isolated failures but are reproduced through reinforcing feedback processes that sustain poor performance over time.


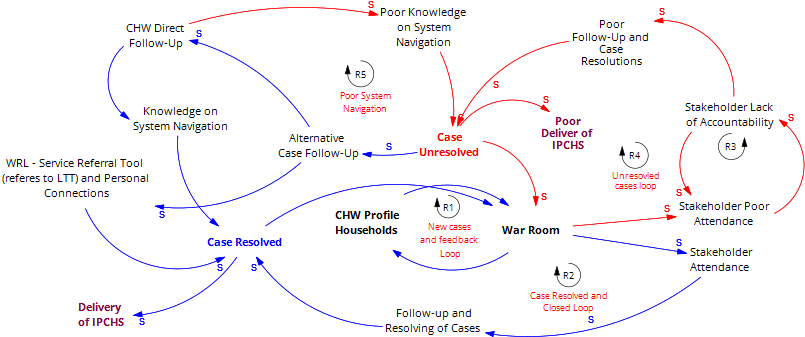


**Figure 2:** Causal loop diagram showing case management and referral in War Rooms in KwaZulu-Natal, South Africa

**3.8 Refinement of the Programme Theory**

The refinement of the programme theory involved moving from the initial assumptions about how OSS was expected to function to an empirically grounded and theoretically informed explanation of how intersectoral collaboration operates in practice. The IPT (Table 2) conceptualised War Rooms as structured governance platforms that would enable coordinated, accountable, and collaborative action across sectors. It assumed that the presence of formal structures, shared spaces for engagement, and defined roles would trigger mechanisms such as shared responsibility, role clarity, and sustained motivation, thereby enabling CHWs to contribute effectively to integrated people-centred care.

However, the empirical findings presented in this study demonstrated that these mechanisms were not consistently activated. Instead, their activation was contingent on specific contextual conditions, revealing important divergences from the assumptions embedded in the IPT. Rather than functioning as stable and enabling governance arrangements, War Rooms operated as context-dependent platforms whose effectiveness varied according to the strength of accountability, the clarity of roles, the availability of institutional support, and the functionality of coordination processes.

A key shift from the IPT to the refined programme theory (RPT) relates to the role of accountability. While the IPT assumed that formal positioning within government structures would be sufficient to ensure coordinated participation, the findings showed that accountability must be actively enforced to generate collective action. In the absence of enforceable accountability, stakeholders interpreted participation as optional, leading to fragmented engagement and limiting the capacity of the platform to support integrated service delivery. The RPT therefore reconceptualises accountability not as a structural feature, but as a generative mechanism that conditions the functioning of intersectoral collaboration.

A second important shift concerns role clarity and the positioning of CHWs within intersectoral systems. The IPT assumed that clearly defined roles within the War Room platform would enable coordinated action across sectors. However, the findings revealed that roles were often unclear, unevenly enacted, or unsupported. In this context, CHWs responded by extending beyond their formal mandates, driven by a sense of moral obligation to address unmet household needs. The RPT therefore reframes CHWs’ contributions as emerging from the interaction between institutional gaps and actor-driven responses, rather than from predefined role configurations. This highlights that integration is often achieved through adaptive practices rather than structured coordination.

The refinement process also identified a shift in how motivation and legitimacy operate within the system. While the IPT assumed that participation in collaborative platforms would sustain engagement through shared goals and coordination, the findings showed that motivation was initially driven by commitment to communities but became fragile in the absence of institutional support and responsive systems. Repeated experiences of unresolved cases and limited follow-through reduced perceived efficacy and legitimacy, leading to disengagement. The RPT therefore emphasises that sustained participation depends on the alignment between institutional conditions and actors’ expectations of effectiveness.

In addition, the IPT assumption that formal coordination structures would facilitate effective service delivery was challenged by the observed reliance on informal networks. Rather than functioning primarily through institutionalised processes, intersectoral collaboration was often enacted through personal relationships and locally embedded networks that enabled actors to navigate system constraints. The RPT conceptualises these informal mechanisms as compensatory responses that enable partial system functionality, but which also shift responsibility away from institutional processes and limit the reliability of coordinated care.

Finally, the refinement of the programme theory highlights the centrality of case management and referral processes as operational mechanisms underpinning integrated care. While the IPT assumed that War Rooms would support efficient coordination and follow-up, the findings revealed that bureaucratic complexity, unclear responsibilities, and multi-step referral pathways frequently resulted in delays and unresolved cases. The RPT therefore positions the functionality of referral systems as a critical determinant of whether intersectoral collaboration translates into effective, people-centred care.

Taken together, the refined programme theory conceptualises intersectoral collaboration within OSS as a dynamic and contingent system in which integration is not guaranteed by the presence of governance structures alone. Instead, integrated people-centred care emerges when governance arrangements successfully trigger and sustain mechanisms such as accountability, role clarity, legitimacy, and coordinated action across sectors. Where these conditions are absent, collaboration becomes fragmented, and CHWs’ contributions are sustained through adaptive but often unsustainable practices. This reframing situates CHWs not simply as implementers within a coordinated system, but as actors navigating and compensating for system-level constraints, with important implications for the design and strengthening of intersectoral governance in resource-constrained health systems. These refined programme theories represent transferable explanations of how intersectoral collaboration shapes frontline practice in resource-constrained health systems. Table 3 presents the refined programme theories.

**Table 3: Refined Programme Theories**

| Refined Programme Theories | Context (C) | Mechanism (M) – Reasoning/Response | Outcome (O) |
| --- | --- | --- | --- |
| RPT 1 | Intersectoral platforms are formally established, but accountability is unevenly enforced, and stakeholder participation is inconsistent | Stakeholders interpret participation as optional and, over time, perceive coordination processes as ineffective when issues remain unresolved | Declining attendance, repeated discussion of unresolved cases, and weakening of the platform’s ability to coordinate integrated responses |
| RPT2 | Roles and responsibilities across sectors are unclear within contexts of high and complex household needs | CHWs interpret unmet needs as their responsibility, driven by moral obligation in the absence of clear boundaries and institutional support | CHWs extend beyond their formal roles to sustain coordination, enabling partial system functioning but resulting in role strain, emotional burden, and reduced sustainability |
| RPT 3 | War Rooms operate within resource-constrained and weakly responsive institutional environments | Actors reassess their efforts as ineffective when cases are not resolved, leading to diminished motivation and weakened sense of legitimacy over time | Disengagement, reduced follow-through, and erosion of trust in the system’s ability to deliver coordinated, people-centred care by CHWs and the community |
| RPT 4 | Formal coordination and referral pathways are fragmented, delayed, and lack clear ownership across sectors | Actors rely on informal networks and personal relationships to navigate system constraints and secure responses | Some cases are resolved through adaptive practices, but outcomes are inconsistent and dependent on individual initiative, limiting system reliability and continuity of care |

**4. Discussion**

This study advances understanding of intersectoral collaboration by showing that the presence of collaborative governance platforms does not, in itself, translate into coordinated and integrated care. Across cases, the functioning of the OSS platform depended on whether participation was actively sustained, roles were clearly enacted, and follow-through on decisions was realised. Where these elements were weak or inconsistent, collaboration became fragmented, and the platform struggled to support timely and coordinated responses to household needs. These findings reinforce emerging evidence from intersectoral collaboration research that formal structures alone are insufficient, and that the effectiveness of collaboration is shaped by how authority, participation, and responsibility are enacted in practice. In line with realist-informed work by Aivalli and colleagues, this study demonstrates that collaboration is contingent on how actors interpret and respond to institutional arrangements, rather than on the existence of those arrangements alone (Aivalli, Dada, *et al.*, 2025; Aivalli, Gilmore, *et al.*, 2025).

A key contribution of this study lies in showing how gaps in intersectoral coordination are absorbed at the frontline. CHWs, positioned at the interface between households and services, extended beyond their formal roles in response to unmet needs. This was not driven by formal expectations within the system, but by a strong sense of responsibility to communities. However, this pattern of response was not sustainable. As unresolved cases accumulated and support from other sectors remained inconsistent, CHWs experienced growing frustration, emotional strain, and disengagement. These findings align with broader literature highlighting the hidden burden placed on frontline actors within fragmented systems, where expectations of integration are not matched by institutional support (Kok *et al.*, 2015; Raven, Wurie and Witter, 2018; Scott *et al.*, 2018; Buthelezi *et al.*, 2026). Rather than functioning solely as connectors within a coordinated system, CHWs in this study were effectively compensating for systemic gaps, raising important questions about the sustainability of community-based models of care in the absence of functioning intersectoral support.

The study also demonstrates that, in the absence of reliable coordination processes, collaboration is often sustained through informal and relational practices. Stakeholders drew on personal networks, local knowledge, and relationships with non-governmental organisations to resolve cases that could not be addressed through formal channels. While these practices enabled partial problem-solving, they also introduced variability and dependence on individual initiative. This finding resonates with existing work on collaborative governance in low- and middle-income settings, which shows that informal arrangements often emerge as pragmatic responses to institutional constraints (Gilson *et al.*, 2014; Aivalli, Dada, *et al.*, 2025; Aivalli, Gilmore, *et al.*, 2025). However, the reliance on such practices also highlights a critical limitation that suggests that systems that depend on individual relationships rather than institutionalised processes are inherently unstable and difficult to scale. This study, therefore, contributes to a growing body of evidence that distinguishes between coordination that is system-enabled and coordination that is individually enacted (Schaaf *et al.*, 2018; Aivalli, Gilmore, *et al.*, 2025).

Importantly, these findings offer a more grounded interpretation of integrated people-centred health services. While IPCHS emphasises coordination across sectors as one of its strategies, responsiveness to individual needs, and continuity of care, this study shows that these goals are not realised through policy intent alone. Instead, they depend on the alignment between governance processes, resource availability, and the ability of systems to respond to identified needs. Where accountability was weak, roles were unclear, and referral processes were slow or fragmented, coordination of services did not occur, despite the presence of a formal platform designed to enable it. Conversely, where coordination processes functioned more effectively, even in limited instances, there was evidence of improved responsiveness and resolution of cases. This suggests that integrated people-centred care should be understood not as a structural feature of the system, but as an outcome that emerges when coordination processes are consistently supported and enacted.

By incorporating a systems perspective through causal loop analysis, this study extends existing work on intersectoral collaboration by showing how coordination challenges are reproduced through reinforcing feedback processes, rather than occurring as isolated failures. This perspective highlights that improving intersectoral collaboration requires not only addressing individual barriers but also disrupting systemic patterns that reproduce fragmentation. In doing so, the study contributes a dynamic understanding of how intersectoral governance processes unfold over time, complementing existing literature that has largely focused on static descriptions of collaboration (Ansell and Gash, 2008; Emerson, Nabatchi and Balogh, 2012; Glandon *et al.*, 2018).

**Practice and Policy Implications**

From a policy and practice perspective, the findings highlight that strengthening intersectoral collaboration requires more than establishing platforms for engagement. First, there is a need to ensure that participation is not voluntary in practice, but supported by clear expectations, accountability, and follow-through across sectors. Second, roles and responsibilities within collaborative platforms need to be clearly defined and consistently enacted to prevent the shifting of responsibilities onto already stretched frontline actors. Third, coordination processes, particularly referral and case management pathways, need to be streamlined and supported to ensure that issues raised within collaborative spaces translate into action. Without these elements, intersectoral structures such as OSS risk becoming spaces for discussion rather than platforms for coordinated service delivery.

**Strengths and Limitations**

This study has several strengths. It applies a realist evaluation approach to generate explanatory insights into how intersectoral collaboration operates in practice, moving beyond descriptive accounts of governance platforms. The use of multiple data sources, including observations, interviews, and document review, enabled triangulation and strengthened the robustness of the analysis. Another strength of this study lies in linking frontline experiences with system-level dynamics, providing a multi-level explanation of intersectoral collaboration that is rarely captured in existing literature. The integration of systems thinking through causal loop diagrams further enhanced the analysis by illustrating how patterns of interaction are sustained over time, providing a dynamic perspective on system functioning. However, the study also has limitations. Data collection focused on a limited number of cases within a single district, which may constrain the transferability of findings to other contexts. In addition, interviews were conducted with War Room leaders, and the perspectives of other stakeholders, including representatives from different sectors, may have provided additional insights into coordination processes. Despite these limitations, the findings offer analytically transferable insights into how intersectoral collaboration is enacted in resource-constrained settings.

**Conclusion**

This study shows that intersectoral collaboration cannot be assumed to produce integrated people-centred care simply through the establishment of intersectoral governance platforms. Integration emerges when coordination processes are actively supported through sustained participation, clear roles, and responsive systems. In their absence, collaboration becomes fragmented, and frontline actors, in this case CHWs, absorb the consequences of system failure. This repositions CHWs not simply as implementers within coordinated systems, but as actors who mediate and compensate for gaps in intersectoral governance, often at significant personal and professional cost.

By providing an empirically grounded explanation of how intersectoral collaboration operates in practice, this study contributes to a more nuanced understanding of the conditions under which CHWs can deliver integrated people-centred care through collaborative community-level platforms in low- and middle-income settings. Furthermore, these findings have important implications for health systems strengthening in low- and middle-income countries, which suggests that investments in intersectoral collaboration must move beyond establishing coordination structures to ensuring that institutional conditions required for sustained, accountable, and effective collective action are realised and established.

**Funding:** *This research has been supported by funding from the UK Foreign, Commonwealth & Development Office (FCDO), Medical Research Council (MRC) and Wellcome Trust (MR/V015044/1 to IP) (Duration - Sept 2021 - September 2024). The work reported herein was supported by the South African Medical Research Council through its Division of Research Capacity Development under the SAMRC Researcher Development Award with funding received from the South African National Department of Health (UB ) (Duration - Sept 2024 - September 2025).*

**Competing interests:** The authors have declared that no competing interests exist.

**Author Contributions**

- ***Conceptualization:*** *Usangiphile E Buthelezi, André J van Rensburg, Mosa Moshabela, and Inge Petersen.*
- ***Data curation:*** *Usangiphile E Buthelezi, Sanah Bucibo, Gcina Radebe*
- ***Formal analysis:*** *Usangiphile E Buthelezi and André J van Rensburg*
- ***Funding acquisition:*** *Inge Petersen, André J van Rensburg, and Usangiphile E Buthelezi*
- ***Investigation:*** *Usangiphile E Buthelezi*
- ***Methodology:*** *Usangiphile E Buthelezi and André J van Rensburg*
- ***Project administration:*** *Tasneem Kathree*
- ***Resources:*** *André J van Rensburg, and Inge Petersen.*
- ***Supervision:*** *André J van Rensburg, Mosa Moshabela, Zamasomi Luvuno, Tasneem Kathree, Arvin Bhana, and Inge Petersen*
- ***Visualization:*** *Usangiphile E Buthelezi*
- ***Validation:*** *Arvin Bhana, Inge Petersen, Mosa Moshabela, and André J van Rensburg*
- ***Writing – original draft:*** *Usangiphile E Buthelezi*
- ***Writing – review and editing:*** *Usangiphile E Buthelezi, André J van Rensburg, Mosa Moshabela, Zamasomi Luvuno, Arvin Bhana, Tasneem Kathree, and Inge Petersen*

**Data availability**

*All published data referenced in this study is openly available online. Unpublished dataset extracted and used in this article from the realist studies under review is available in NVivo format at the following link:* [*https://figshare.com/articles/dataset/A_Realist_Perspective_on_Optimizing_Community_Health_Workers_roles_and_functions_to_deliver_Integrated_people-centred_care/29424230*](https://figshare.com/articles/dataset/A_Realist_Perspective_on_Optimizing_Community_Health_Workers_roles_and_functions_to_deliver_Integrated_people-centred_care/29424230)*. The availability of the data share is in line with FAIRSharing principles (https://fairsharing.org/) and Wellcome Open Research Data Guidelines (*[*https://wellcomeopenresearch.org/for-authors/data-guidelines*](https://wellcomeopenresearch.org/for-authors/data-guidelines)*). For more information on the data set contact* [*crh@ukzn.ac.za*](mailto:crh@ukzn.ac.za)*.*

**Statement on the Use of Artificial Intelligence (AI) Tools**

*In the preparation of this manuscript, AI-assisted tools were utilized for specific technical purposes, including assistance with grammar support to refine clarity and flow of sentences, but all conceptual development, analysis, writing and interpretation are entirely by the authors. The AI tool used was DeepSeek AI Version: DeepSeek-R1. All AI-generated outputs were critically reviewed and verified by the authors to maintain accuracy, coherence, and adherence to ethical research and publishing standards. The authors take the final responsibility for the content in this research article.*

**References**

Aivalli, P., Dada, S., *et al.* (2025) “Power dynamics and intersectoral collaboration for health in low- and middle-income countries: a realist review,” *Health Policy and Planning*, 40(6), pp. 661–683. Available at: https://doi.org/10.1093/heapol/czaf022.

Aivalli, P., Gilmore, B., *et al.* (2025) “Understanding the influence of power dynamics in intersectoral collaboration: A realist evaluation in Assam, India,” *PLOS Global Public Health*, 5(12), p. e0005639. Available at: https://doi.org/10.1371/journal.pgph.0005639.

Ansell, C. and Gash, A. (2008) “Collaborative Governance in Theory and Practice,” *Journal of Public Administration Research and Theory*, 18(4), pp. 543–571. Available at: https://doi.org/10.1093/jopart/mum032.

Buthelezi, U.E., Rensburg, A.J. van, *et al.* (2025) “A realist perspective on optimizing community health workers’ roles and functions to deliver integrated people-centred care,” *PLOS Global Public Health*, 5(9), p. e0004926. Available at: https://doi.org/10.1371/journal.pgph.0004926.

Buthelezi, U.E., van Rensburg, A.J., *et al.* (2025) “Optimizing the role and functions of CHWs in service of a people-centred community health system in sub-Saharan Africa. A realist synthesis,” *SSM - Health Systems*, 5, p. 100089. Available at: https://doi.org/10.1016/j.ssmhs.2025.100089.

Buthelezi, U.E. *et al.* (2026) “Reconceptualizing integrated people-centred health services: Towards a mechanism-sensitive model using realist evaluation,” *Social Science & Medicine*, 398, p. 119190. Available at: https://doi.org/10.1016/j.socscimed.2026.119190.

Dalkin, S.M. *et al.* (2015) “What’s in a mechanism? Development of a key concept in realist evaluation,” *Implementation Science*, 10(1), p. 49. Available at: https://doi.org/10.1186/s13012-015-0237-x.

Emerson, K., Nabatchi, T. and Balogh, S. (2012) “An Integrative Framework for Collaborative Governance,” *Journal of Public Administration Research and Theory*, 22(1), pp. 1–29. Available at: https://doi.org/10.1093/jopart/mur011.

Gilson, L. *et al.* (2014) “Advancing the application of systems thinking in health: South African examples of a leadership of sensemaking for primary health care,” *Health Research Policy and Systems*, 12(1), p. 30. Available at: https://doi.org/10.1186/1478-4505-12-30.

Glandon, D. *et al.* (2018) “Identifying health policy and systems research priorities on multisectoral collaboration for health in low-income and middle-income countries,” *BMJ Global Health*, 3(Suppl 4). Available at: https://doi.org/10.1136/bmjgh-2018-000970.

Greenhalgh, J. and Manzano, A. (2022) “Understanding ‘context’ in realist evaluation and synthesis,” *International Journal of Social Research Methodology: Theory & Practice*, 25(5), pp. 583–595. Available at: https://doi.org/10.1080/13645579.2021.1918484.

Human Sciences Research Council (2024) *KwaZulu-Natal reports second-highest HIV prevalence rate in South Africa*. Available at: https://hsrc.ac.za/wp-content/uploads/2024/09/23-09-2024-Press-Release-SABSSM-VI_KwaZulu-Natal-Provincial-findings_vFinal.pdf (Accessed: April 8, 2026).

Khuzwayo, L.S. and Moshabela, M. (2017) “The perceived role of ward-based primary healthcare outreach teams in rural KwaZulu-Natal, South Africa,” *African Journal of Primary Health Care and Family Medicine*, 9(1), pp. 1–5. Available at: https://doi.org/10.4102/phcfm.v9i1.1388.

Kok, M.C. *et al.* (2015) “Which intervention design factors influence performance of community health workers in low- and middle-income countries? A systematic review,” *Health Policy and Planning*, 30(9), pp. 1207–1227. Available at: https://doi.org/10.1093/heapol/czu126.

Lacouture, A. *et al.* (2015) “The concept of mechanism from a realist approach: a scoping review to facilitate its operationalization in public health program evaluation,” *Implementation Science : IS*, 10, p. 153. Available at: https://doi.org/10.1186/s13012-015-0345-7.

Marchal, B. *et al.* (2012) “Is realist evaluation keeping its promise? A review of published empirical studies in the field of health systems research,” *Evaluation*, 18(2), pp. 192–212. Available at: https://doi.org/10.1177/1356389012442444.

McEwan, K. *et al.* (no date) “‘For Want of a Nail’: developing a transparent approach to retroduction and early initial programme theory development in a realist evaluation of community end of life care services,” *International Journal of Social Research Methodology*, 27(4), pp. 417–430. Available at: https://doi.org/10.1080/13645579.2023.2184920.

Mukumbang, F.C. *et al.* (2020) “Using the realist interview approach to maintain theoretical awareness in realist studies,” *Qualitative Research*, 20(4), pp. 485–515. Available at: https://doi.org/10.1177/1468794119881985.

National Department of Health, South Africa (2018) *Policy Framework and Strategy for Ward Based Primary Healthcare Outreach Teams*. Available at: https://www.health.gov.za/wp-content/uploads/2020/11/policy-wbphcot-4-april-2018_final-copy.pdf (Accessed: February 13, 2025).

National Department of Health, South Africa (no date) *National TB Recovery Plan 4.0: April 2025 – March 2026*. Available at: https://www.health.gov.za/wp-content/uploads/2025/05/TB-Recovery-Plan-4_final_250526-1.pdf (Accessed: April 8, 2026).

Pawson, R. and Tilley, N. (1997) *Realistic evaluation*. Thousand Oaks, CA, US: Sage Publications, Inc (Realistic evaluation), pp. xvii, 235.

Province of KwaZulu Natal Department of Human Settlements (2013) “Operation Sukuma Sakhe Guidelines.” Available at: https://www.kzndhs.gov.za/images/documents/Provincial%20Policies/OSS_GuidelinesJune_201.pdf (Accessed: April 25, 2025).

Province of KwaZulu-Natal (2011) “Operation Sukuma Sakhe: Implementation Model - Guidelines for Coordination.” Available at: https://www.kznonline.gov.za/images/Downloads/OSS/E%20Implementation%20Model_distribution.pdf (Accessed: April 25, 2025).

Province of KwaZulu-Natal (2015) “Operation Sukuma Sakhe Operations Handbook.” Available at: https://www.kznonline.gov.za/images/Downloads/OSS/Operations%20Handbook/OSS%20Operations%20handbook.pdf (Accessed: April 25, 2025).

Rasanathan, K. *et al.* (2017) “Governing multisectoral action for health in low- and middle-income countries,” *PLOS Medicine*, 14(4), p. e1002285. Available at: https://doi.org/10.1371/journal.pmed.1002285.

Raven, J., Wurie, H. and Witter, S. (2018) “Health workers’ experiences of coping with the Ebola epidemic in Sierra Leone’s health system: a qualitative study,” *BMC health services research*, 18(1), p. 251. Available at: https://doi.org/10.1186/s12913-018-3072-3.

Schaaf, M. *et al.* (2018) “Community health workers and accountability: reflections from an international ‘think-in,’” *International Journal for Equity in Health*, 17(1), p. 66. Available at: https://doi.org/10.1186/s12939-018-0781-5.

Schneider, H. *et al.* (2018) “Ward-based primary health care outreach teams in South Africa: developments, challenges and future directions.” Available at: http://hdl.handle.net/10566/5060 (Accessed: February 4, 2026).

Scott, K. *et al.* (2018) “What do we know about community-based health worker programs? A systematic review of existing reviews on community health workers,” *Human Resources for Health*, 16(1), p. 39. Available at: https://doi.org/10.1186/s12960-018-0304-x.

Sheikh, K., George, A. and Gilson, L. (2014) “People-centred science: strengthening the practice of health policy and systems research,” *Health Research Policy and Systems*, 12, p. 19. Available at: https://doi.org/10.1186/1478-4505-12-19.

Wong, G. *et al.* (2016) “RAMESES II reporting standards for realist evaluations,” *BMC Medicine*, 14(1), p. 96. Available at: https://doi.org/10.1186/s12916-016-0643-1.

World Health Organisation (2016) *Framework on integrated, people-centred health services: Report by the Secritariet*. Available at: https://apps.who.int/gb/ebwha/pdf_files/wha69/a69_39-en.pdf (Accessed: February 22, 2025).

World Health Organisation (2018) *A vision for primary health care in the 21st century: Towards universal health coverage and the Sustainable Development Goals*. Available at: https://www.who.int/publications/i/item/WHO-HIS-SDS-2018.15 (Accessed: April 7, 2026).

World Health Organization. (2018) “WHO guideline on health policy and system support to optimize community health worker programmes.” Geneva: WHO. Available at: https://www.who.int/publications/i/item/9789241550369 (Accessed: April 10, 2025).
